# Supplementary material for: Characterization of the Promoter Regions of Two Sheep Keratin-Associated Protein Genes for Hair Cortex-Specific Expression
Source: PLoS One. 2016 Apr 21;11(4):e0153936. doi: 10.1371/journal.pone.0153936 (PMC4839604; doi:10.1371/journal.pone.0153936)
Supplement: S1 Table — (XLSX) [file pone.0153936.s004.xlsx]

## Sheet: Sheet1
S1 Table. Primers used for the genes expression in the sheep tissues via RT-PCR and qRT-PCR
Primer	Forward Primers(5'-3')	Reverse Primers(5'-3')	Tm(°C)	Product Size(bp)	Accession Number
KRTAP3-3	ACTCTTCCCAGCCCACCCCA	AGCGGAGCCACAGTTAGTTGCAG	60	186	NM_001077103.1
KRTAP11-1	TGACCTCTCGGCAAACCAC	CTTCTCACTGGCTTGCACAC	60	127	HQ595347.1
KRT5	CGTCTCCCGCACCAGTTTCACCT	CCAGCACCAGCACCAAATCGGTT	63.4	198	NM_001008663.1
KRT83	CATGACCTGTGGCTTCAGCACTGT	CGGTAGCAGGAGATGCCGCGGTAG	62.5	132	NM_001083385.1
18S	ACGGACCAAAGTGAAAGCAT	ATCACCAGTCGGCATCGTTT	60	119	XM_004004356.2
